# Supplementary material
Source: publisher figshare collection journal article supplement (https://wiley.figshare.com/articles/dataset/_/3549897)
Supplement: Supplementary file 1 [file 1]

**R. Guimerà, D. B. Stouffer, M. Sales-Pardo, E. A. Leicht, M. E. J. Newman, and L. A. N. Amaral. 2010. Origin of compartmentalization in food webs. *Ecology* 91:2941–2951.**

# Origin of compartmentalization in food webs

(Digital Appendices)

R. Guimerà, D. B. Stouffer, M. Sales-Pardo, E. A. Leicht,  
M. E. J. Newman, and L. A. N. Amaral

## **B Confidence intervals for compartment properties**

To establish the significance of a given compartment property with respect to a model, we use the following procedure. For property  $p$ , we calculate the  $z$ -score  $z = (p_e - \langle p_M \rangle) / \sigma_{p_M}$ , where  $p_e$  is the empirical value of the property,  $\langle p_M \rangle$  is the mean of the property for the model, and  $\sigma_{p_M}$  is the standard deviation of the property for the model. We then estimate the 95% expectation of the model as the region for which  $|z| < 1.960$ , and the 99% expectation of the model as the region for which  $|z| < 2.576$ . This approximation is exact for properties that are normally distributed in the model (like the modularity) but not for non-normally distributed properties (like the number of compartments).
